# Supplementary material for: Renewable pine cone biomass derived carbon materials for supercapacitor application
Source: Royal Society of Chemistry journal article supplement (doi:10.1039/c5ra21708c), 2015-12-03
Supplement: c5ra21708c1.pdf [file c5ra21708c1.pdf]

## **Renewable pine cone biomass derived carbon materials for supercapacitor application**

A. Bello, N. Manyala\*, F. Barzegar, A. A. Khaleed, D. Y. Momodu and J. K. Dangbegnon

Department of Physics, Institute of Applied Materials, SARCHI Chair in Carbon Technology and Materials, University of Pretoria, Pretoria 0028, South Africa.

\***Email address:** [ncholu.manyala@up.ac.za](mailto:ncholu.manyala@up.ac.za) (N. Manyala).

Tel: +27 (0)12 420 3549, Fax: +27 (0)12 420 2516

Table S1: Elemental analysis of APC sample carbonized at 800 °C.

| Sample | C at.%     | N at.% | O at.%    | K at.% |
|--------|------------|--------|-----------|--------|
| APC    | 94.9 ± 0.3 | <1.0   | 4.0 ± 0.3 | <1.0   |

Table S2. XPS peak fitting results for APC sample carbonized at 800 °C.

| Region | BE [eV]       | FWHM [eV] | Fraction | Assigned to                     | Reference |
|--------|---------------|-----------|----------|---------------------------------|-----------|
| C 1s   | 284.6         | 1.2       | 0.37     | C-C                             | 1         |
|        | 285.2         | 1.6       | 0.38     | CH <sub>x</sub>                 | 2         |
|        | 286.8         | 2.0       | 0.09     | C-O-/C-N                        | 1         |
|        | 288.5         | 1.9       | 0.05     | COO                             | 1         |
|        | 290.7         | 2.0       | 0.04     | Na <sub>2</sub> CO <sub>3</sub> | 3         |
|        | 293.8 (296.5) | 2.0 (2.0) | 0.07     | Potassium<br>oxide/hydroxide    |           |
| N 1s   | 398.5         | 1.8       | 0.42     | Pyridine/Amine                  | 4         |
|        | 400.3         | 1.8       | 0.58     | Nitrile/Pyrrole                 | 4         |
| O 1s   | 531.0         | 2.1       | 0.20     | Potassium<br>oxide/hydroxide    | 5         |
|        | 532.2         | 2.2       | 0.61     | oxide/hydroxide                 | 1         |
|        | 533.8         | 2.2       | 0.19     | C-O-<br>COO                     | 1         |

Table S3 Fitting parameters for the equivalent circuit

| R <sub>s</sub> | Q                       | C <sub>1</sub> | C <sub>2</sub> | R <sub>CT</sub> |
|----------------|-------------------------|----------------|----------------|-----------------|
| (Ω)            | (F.s <sup>(a-1)</sup> ) | (F)            | (F)            | (Ω)             |
| 1.47           | 0.066                   | 0.004          | 0.118          | 1.75            |

$$\chi^2 = 0.005, \chi/\sqrt{N} = 0.01,$$

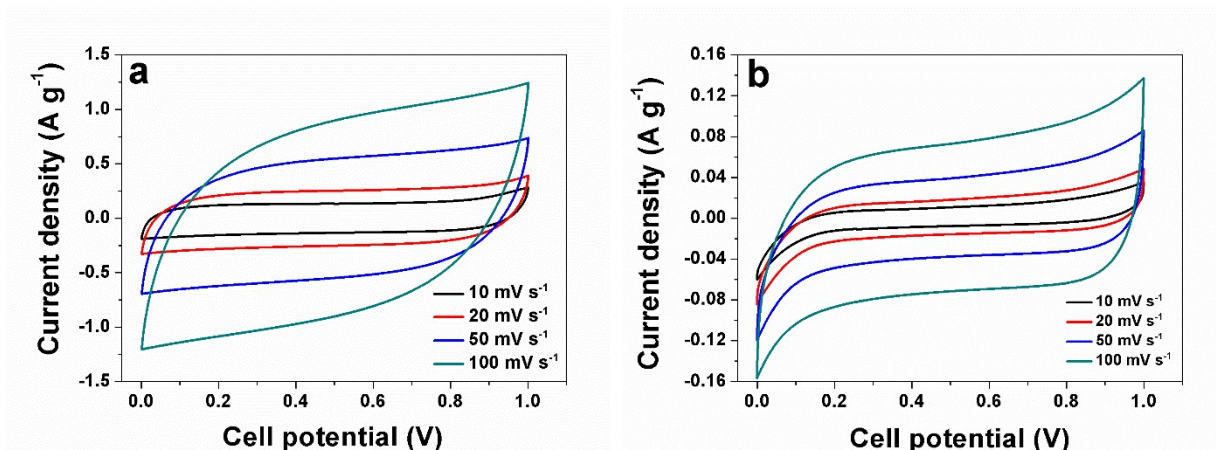

Figure S1 Electrochemical performance of (a) CV curves of APC-700 °C; (b) CV curves of APC-900 °C devices at different scan rates.

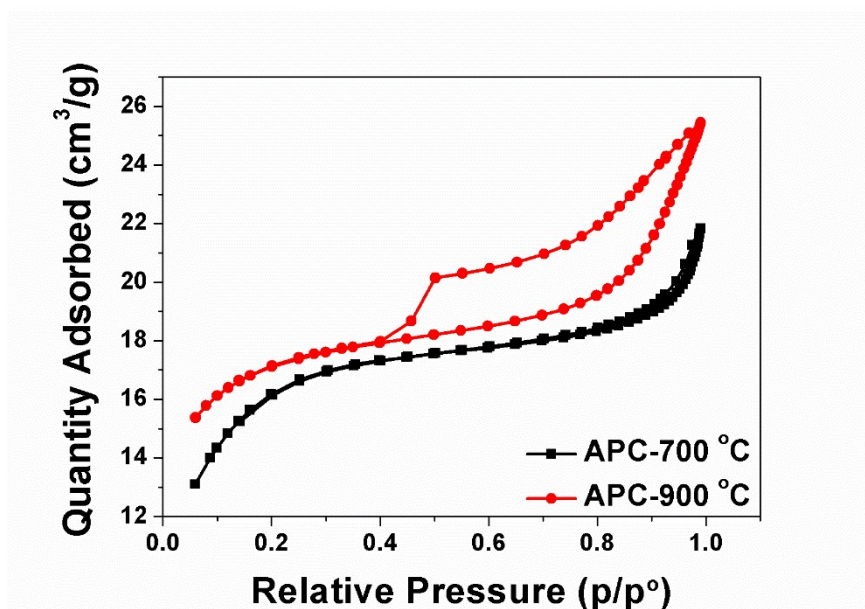

Figure S2  $\text{N}_2$  isotherm of APC-700 °C and APC-900 °C materials.

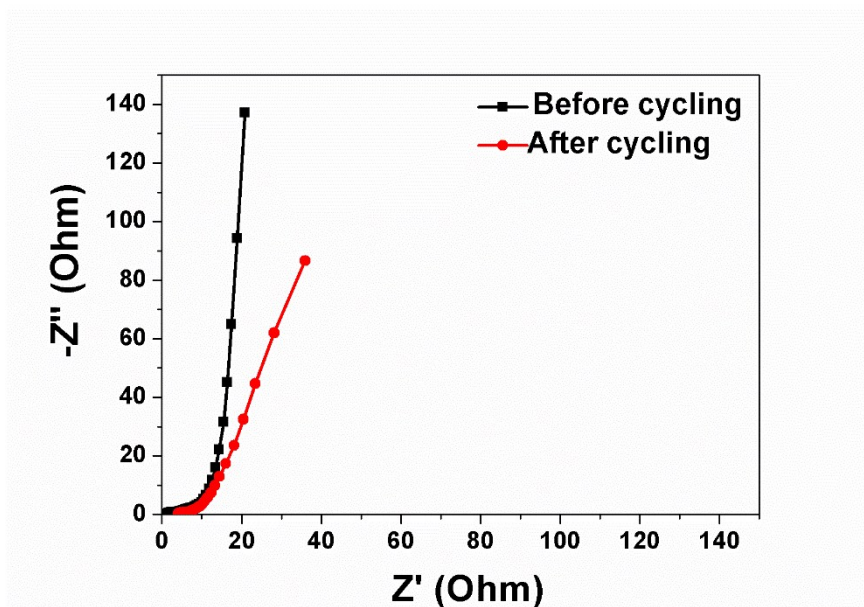

Figure S3 Nyquist plot before and after cycling

#### Reference

- (1) Terzyk, A. P. *Colloids Surfaces A Physicochem. Eng. Asp.* **2001**, *177*, 23–45.
- (2) Jayaweera, P. M.; Quah, E. L.; Idriss, H. *J. Phys. Chem. C* **2007**, *111*, 1764–1769.
- (3) Gelius, U.; Heden, P. F.; Hedman, J.; Lindberg, B. J.; Manne, R.; Nordberg, R.; Nordling, C.; Siegbahn, K. *Phys. Scr.* **1970**, *2*, 70.
- (4) Jansen, R. J. J.; Van Bekkum, H. *Carbon* **1995**, *33*, 1021–1027.
- (5) Lamontagne, B.; Semond, F.; Roy, D. *Surf. Sci.* **1995**, *327*, 371–378.
